# Supplementary material
Source: ML conference proceedings conference paper supplement (https://www.ecva.net/papers/eccv_2020/papers_ECCV/html/123520103_ECCV_2020_paper.php)
Supplement: Supplementary file 2 [file 123520103-supp.zip]

# Image-to-Voxel Model Translation for 3D Scene Reconstruction and Segmentation

## Supplementary material

Vladimir V. Kniaz<sup>1,2</sup>[0000–0003–2912–9986],  
Vladimir A. Knyaz<sup>1,2</sup>[0000–0002–4466–244X],  
Fabio Remondino<sup>3</sup>[0000–0001–6097–5342],  
Artem Bordodymov<sup>1</sup>[0000–0001–8159–2375], and  
Petr Moshkantsev<sup>1</sup>[0000–0001–9624–4322]

<sup>1</sup> State Res. Institute of Aviation Systems (GosNIIAS), Moscow, Russia

<sup>2</sup> Moscow Institute of Physics and Technology (MIPT), Russia {knyaz, vl.kniaz,  
bordodymov, moshkantsev}@gosniias.ru

<sup>3</sup> Bruno Kessler Foundation (FBK), Trento, Italy  
remondino@fbk.eu

## 1 Pose6DoF Discriminator

Our **Pose6DoF** discriminator works by processing an input concatenated from a fruxel model and an input image (see Figure 1). Different from modern volumetric discriminators [1], that qualify the input voxel model as being either ‘real’ or ‘fake,’ our **Pose6DoF** discriminator estimates 6DoF poses of objects in the scene and their perceptual realism. Hence, the architecture of our **Pose6DoF** discriminator fuses a pose estimation model and a discriminator. The architecture of our **Pose6DoF** discriminator is based on the inverted volumetric residual blocks.

Firstly, we concatenate the fruxel model (either real or predicted by generator) with the input image. We use ‘copy-inflate’ skip connections to match the 2D-3D dimensions. After that, our **Pose6DoF** processes the input using blocks of 3D inverted residual blocks. Finally, it produces a tensor with  $16 \times 16 \times 16$  cells. Each cell contains five groups of parameters representing annotations of poses of five objects the could be located in the cell. A single group of parameters includes object’s pose  $t = \{x_c, y_c, z_c\}$  in normalized fruxel space coordinates, object’s rotation quaternion  $q = \{q_1, q_2, q_3, q_4\}$ , object’s dimensions  $d = \{w, h, d\}$ , and the probability  $r$  of object being either ‘real’ or ‘fake.’ We cluster annotations hypnotizes similar to [2].

## 2 SemanticVoxels Dataset

Our SemanticVoxels Dataset includes 116k samples of 3D and 2D data. Each data sample represents a single camera pose. It consists of a color image, a semantic frustum voxel model, a depth map, a camera pose, and an object pose annotations for all classes. We made our dataset consistent with the NuScenes

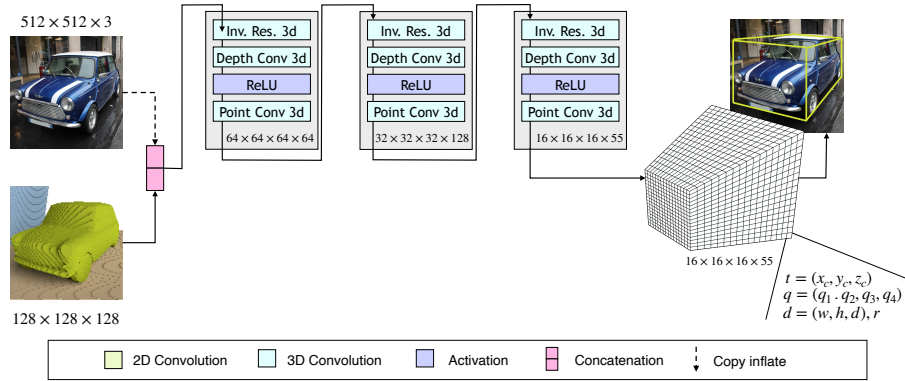

**Fig. 1.** Pose6DoF discriminator.

dataset format [3]. Our dataset is divided into two splits: real and synthetic. The real split was generated using a Structure-from-Motion (SfM) technique similar to [4]. It contains 16k images. Example scenes from the dataset are shown in Figure 2.

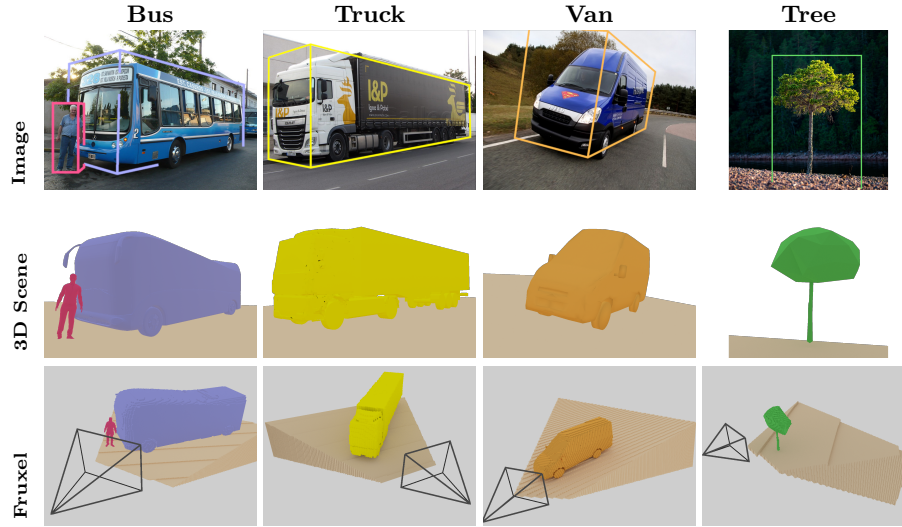

**Fig. 2.** Examples of color images with 6D pose annotations and ground truth semantic voxel models from our SemanticVoxels dataset.

### 3 Qualitative Evaluation

We present additional qualitative results of 3D reconstruction using DISN [5], Pix2Vox [6], 3D-R2N2 [7], and our SSZ on our SemanticVoxels dataset in Figure 3.

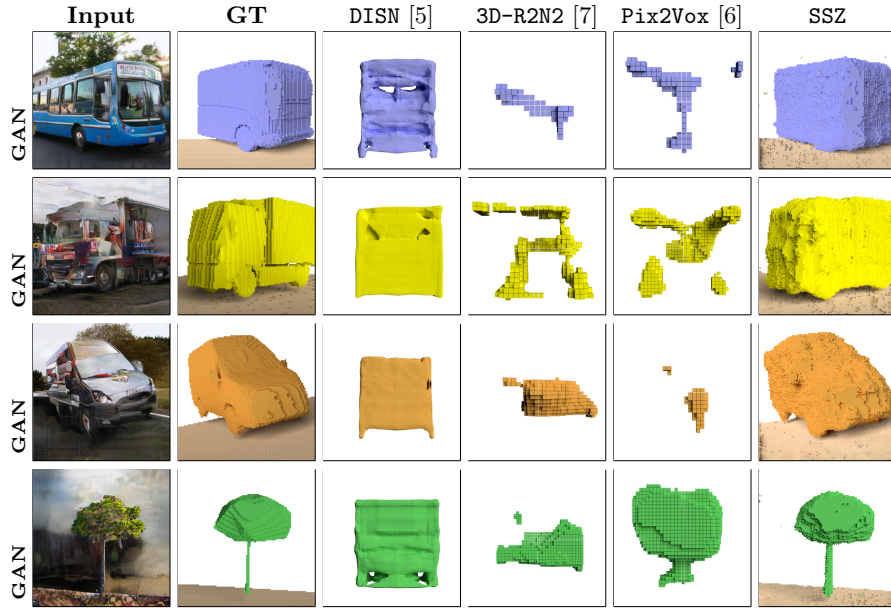

**Fig. 3.** Example of 3D reconstruction using DISN [5], Pix2Vox [6], 3D-R2N2 [7], and our SSZ on our SemanticVoxels dataset.

### References

1. Wu, J., Zhang, C., Xue, T., Freeman, W.T., Tenenbaum, J.B.: Learning a probabilistic latent space of object shapes via 3d generative-adversarial modeling. In: Advances in Neural Information Processing Systems. (2016) 82–90
2. Redmon, J., Farhadi, A.: YOLO9000: better, faster, stronger. In: 2017 IEEE Conference on Computer Vision and Pattern Recognition, CVPR 2017, Honolulu, HI, USA, July 21-26, 2017. (2017) 6517–6525
3. Hodaň, T., Haluza, P., Obdržálek, Š., Matas, J., Lourakis, M., Zabulis, X.: T-LESS: An RGB-D dataset for 6D pose estimation of texture-less objects. IEEE Winter Conference on Applications of Computer Vision (WACV) (2017)
4. Locher, A., Havlena, M., Gool, L.V.: Progressive structure from motion. In: Computer Vision - ECCV 2018 - 15th European Conference, Munich, Germany, September 8-14, 2018, Proceedings, Part IV. (2018) 22–38
5. Xu, Q., Wang, W., Ceylan, D., Mech, R., Neumann, U.: Disn: Deep implicit surface network for high-quality single-view 3d reconstruction. In Wallach, H., Larochelle,

- H., Beygelzimer, A., d'Álché-Buc, F., Fox, E., Garnett, R., eds.: Advances in Neural Information Processing Systems 32. Curran Associates, Inc. (2019) 492–502
6. Xie, H., Yao, H., Sun, X., Zhou, S., Zhang, S.: Pix2vox: Context-aware 3d reconstruction from single and multi-view images. In: The IEEE International Conference on Computer Vision (ICCV). (October 2019)
7. Choy, C.B., Xu, D., Gwak, J., Chen, K., Savarese, S.: 3d-r2n2: A unified approach for single and multi-view 3d object reconstruction. In: Proceedings of the European Conference on Computer Vision (ECCV). (2016)
